# Supplementary material for: High-Temperature Wear Performance of hBN-Added Ni-W Composites Produced from Combustion-Synthesized Powders
Source: Materials (Basel). 2022 Feb 8;15(3):1252. doi: 10.3390/ma15031252 (PMC8839063; doi:10.3390/ma15031252)
Supplement: Supplementary file 1 [file materials-15-01252-s001.zip › materials-1557254-supplementary.pdf]

Supplementary Materials

# High-Temperature Wear Performance of hBN-Added Ni-W Composites Produced from Combustion-Synthesized Powders

Rahul Kumar, Sofiya Aydinyan, Roman Ivanov, Le Liu, Maksim Antonov and Irina Hussainova \*

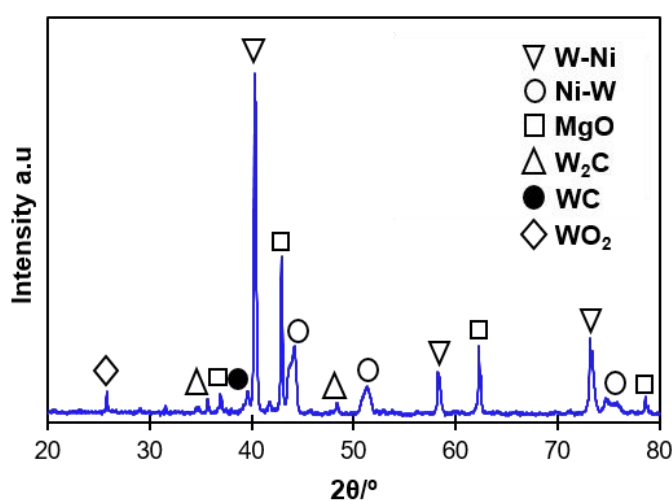

(a)

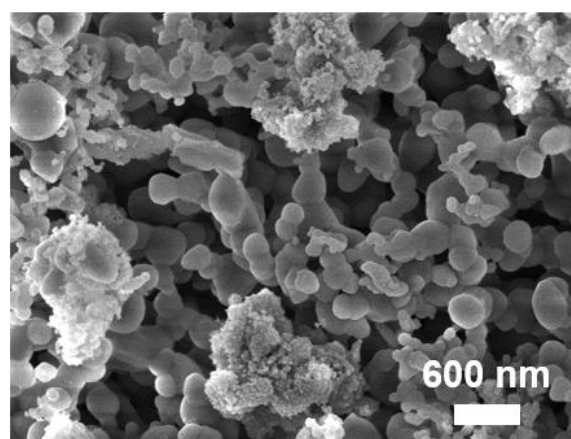

(b)

**Figure S1.** XRD patterns (a); and SEM image (b) of combustion product of mixtures 4NiO-WO<sub>3</sub>-3.2Mg-3.2C-2wt%h-BN before acid leaching.
